# Supplementary material for: SPOT14-Positive Neural Stem/Progenitor Cells in the Hippocampus Respond Dynamically to Neurogenic Regulators
Source: PubMed Central journal article supplement — Stem Cell Reports. 2014 Sep 26;3(5):735–42. doi: 10.1016/j.stemcr.2014.08.013 (PMC4235138; doi:10.1016/j.stemcr.2014.08.013), 2014-09-26
Supplement: mmc1.pdf [file mmc1.pdf]

**Stem Cell Reports, Volume 3**

**Supplemental Information**

**SPOT14-Positive Neural Stem/Progenitor Cells in the  
Hippocampus Respond Dynamically to Neurogenic  
Regulators**

**Marlen Knobloch, Carolin von Schoultz, Luis Zurkirchen, Simon M.G. Braun, Mojca Vidmar, and Sebastian Jessberger**

**Figure S1**

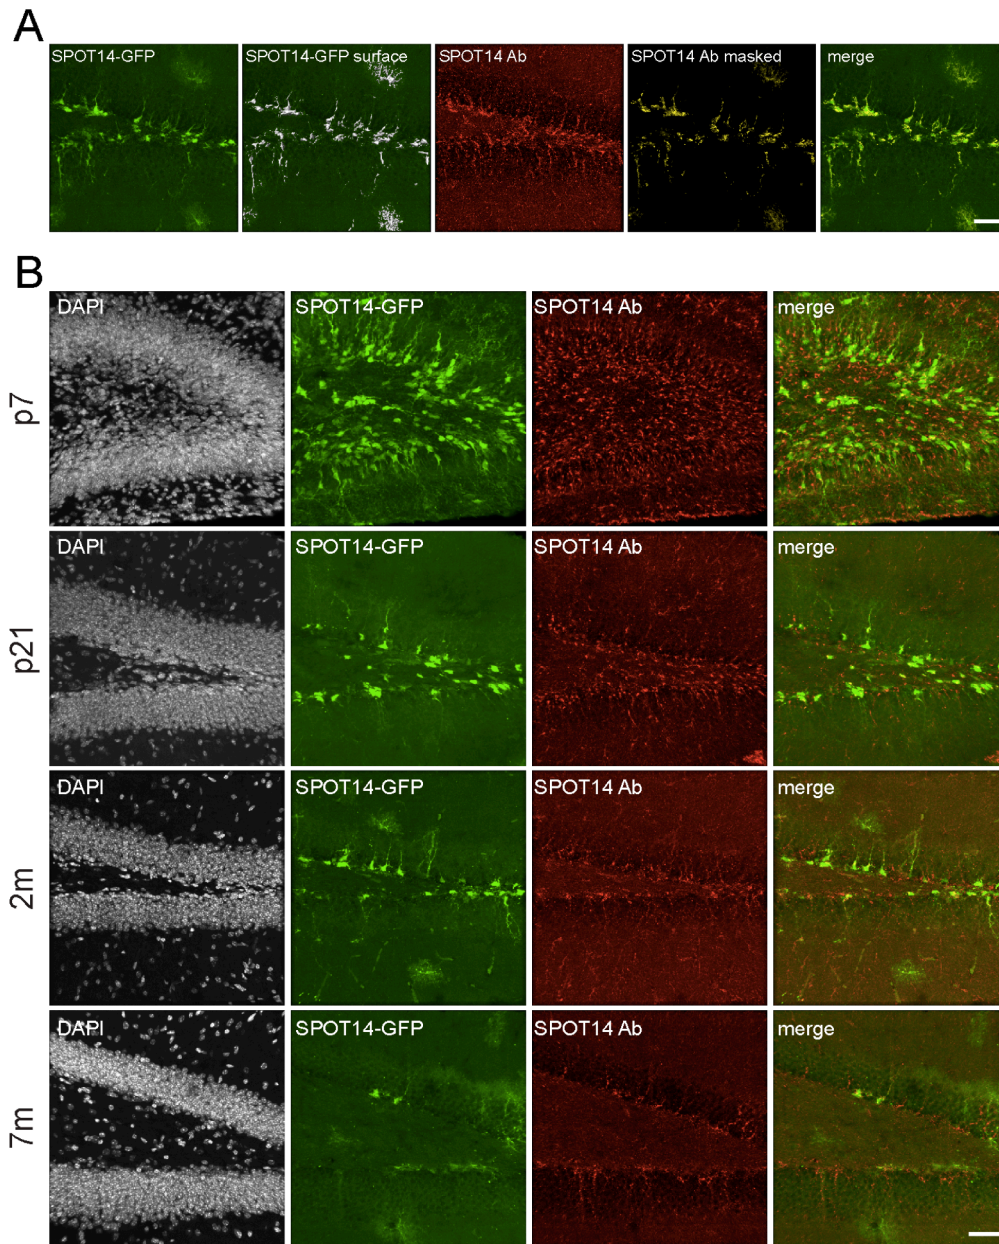

**Figure S1. Endogenous SPOT14 protein is expressed by SPOT14-GFP positive NSPCs**

(A) Quantification method to analyze co-labeling of SPOT14-GFP and endogenous SPOT14 immunohistochemical signal: a 3D surface of the GFP signal is generated using Imaris software (first and second panel), the surface is then used on the endogenous SPOT14 signal (third panel) to mask this channel and generate an artificial co-labeling channel (fourth panel). This co-labeling channel is used together with the SPOT14-GFP channel to determine the number of positive radial and non-radial NSPCs positive for both reporter and endogenous SPOT14. Scale bar represents 50  $\mu$ m.

(B) Analysis of SPOT14 reporter mice at postnatal day 7 (p7), day 21 (p21), 2 months (2m) and 7 months (7m) of age shows that both the endogenous SPOT14 and the SPOT14-GFP reporter signals are drastically reduced with age. Scale bar represents 50  $\mu$ m.

**Table S1: detailed cell numbers of aging experiment**

| <b>Aging (Figure 2)</b>                         | 2m (n = 4)<br>(mean ± SEM) | 7m (n = 3)<br>(mean ± SEM) |
|-------------------------------------------------|----------------------------|----------------------------|
| Total number of SPOT14+ cells per DG            | 1557 ± 176                 | 876 ± 98                   |
| Total number of radial SPOT14+ cells per DG     | 682 ± 97                   | 288 ± 50                   |
| Total number of non-radial SPOT14+ cells per DG | 875 ± 82                   | 588 ± 61                   |
| Percentage of radial SPOT14+ cells per DG       | 43.8 ± 6.3                 | 32.9 ± 5.7                 |
| Percentage of non-radial SPOT14+ cells per DG   | 56.2 ± 5.3                 | 67.1 ± 7.0                 |

**Table S2: detailed cell numbers of running experiment**

| <b>Running (Figure 3)</b>                                            | Con (n = 3)<br>(mean ± SEM) | Run (n = 3)<br>(mean ± SEM) |
|----------------------------------------------------------------------|-----------------------------|-----------------------------|
| Total number of EdU+ cells per DG                                    | 2052 ± 287.7                | 4605 ± 325.1                |
| Total number of SPOT14+ / EdU+ double positive cells per DG          | 166 ± 13.2                  | 269 ± 21.5                  |
| Total number of SPOT14+ cells per DG                                 | 1338 ± 32.4                 | 1584 ± 75.3                 |
| Percentage of radial SPOT14+ / EdU+ double positive cells per DG     | 22.6 ± 2.4                  | 21.4 ± 1.8                  |
| Percentage of non-radial SPOT14+ / EdU+ double positive cells per DG | 77.4 ± 2.4                  | 78.6 ± 1.8                  |

**Table S3: detailed cell numbers of transient ablation experiment**

| <b>Transient ablation (Figure 4)</b>                                 | Con (n = 3)<br>(mean ± SEM) | TMZ (n = 3)<br>(mean ± SEM) | TMZ 3d (n = 3)<br>(mean ± SEM) |
|----------------------------------------------------------------------|-----------------------------|-----------------------------|--------------------------------|
| Total number of EdU+ cells per DG                                    | 943.5 ± 42.7                | 632.0 ± 31.4                | 678.0 ± 90.8                   |
| Total number of SPOT14+ cells per DG                                 | 1708.5 ± 171.6              | 1810.0 ± 158.5              | 1612.0 ± 199.4                 |
| Percentage of SPOT14+ / EdU+ double positive cells of all EdU+ cells | 7.7 ± 0.9                   | 10.8 ± 0.8                  | 12.8 ± 1.8                     |
| Percentage of radial SPOT14+ / EdU+ double positive cells per DG     | 12.6 ± 4.2                  | 12.8 ± 7.2                  | 14.7 ± 7.4                     |
| Percentage of non-radial SPOT14+ / EdU+ double positive cells per DG | 87.4 ± 4.2                  | 87.2 ± 7.2                  | 85.3 ± 7.4                     |
